# Supplementary material for: The von Willebrand factor A1 domain mediates thromboinflammation, aggravating ischemic stroke outcome in mice
Source: PubMed Central journal article supplement — Haematologica. 2020 Feb 27;106(3):819–28. doi: 10.3324/haematol.2019.241042 (PMC7927893; doi:10.3324/haematol.2019.241042), 2020-02-27
Supplement: 2019_241042-Disclosures_Contributions.pdf [file 2019_241042-Disclosures_Contributions.pdf]

Haematologica  
HAEMATOL/2019/241042  
Version 3

The von Willebrand Factor A1 domain mediates thromboinflammation,  
aggravating ischemic stroke outcome in mice

Frederik Denorme, Kimberly Martinod, Aline Vandenbulcke, Cécile V.  
Denis, Peter J. Lenting, Hans Deckmyn, Karen Vanhoorelbeke, and  
Simon F. De Meyer

Disclosures: This work was supported by Fonds voor Wetenschappelijk Onderzoek - Vlaanderen (research grants G.0A86.13, G.0785.17 and 1509216N to S.F.D.M), by the research grants from KU Leuven (OT/14/099 and ISP/14/02L2 to S.F.D.M) and by a research grant from the Queen Elisabeth Medical Foundation (to S.F.D.M). F.D. is a postdoctoral fellow of Fonds voor Wetenschappelijk Onderzoek Vlaanderen (FWO, 12U7818N). K.M. was a H2020 Marie Skłodowska-Curie Actions fellow (under agreement number 747993, "VWF and NETs"). The authors declare no conflict of interest.

Contributions: F.D. designed the study, acquired, analyzed and interpreted the data and wrote the manuscript. S.F.D.M conceived and designed the study, analyzed and interpreted the data and wrote the manuscript. K.M. acquired and analyzed data and reviewed the manuscript. A.V. performed experiments. C.V.D. and P.J.L. provided essential reagents and reviewed the manuscript. H.D. and K.V. reviewed the manuscript.
